# Supplementary material
Source: PubMed Central journal article supplement (PMC3190694)
Supplement: supp_M111.262063_jbc.M111.262063-1.pdf [file supp_M111.262063_jbc.M111.262063-1.pdf]

**Figure S1:** Immunocytochemistry of cultured rat cerebellar granule neurons with an anti-DAO antibody. A. Punctate anti-DAO immunofluorescent labeling was strongly detected in shafts and moderately detected in spines of rat CGNs. Immunofluorescence was abolished when the anti-DAO antibody was omitted (B), or when the anti-DAO antibody was pre-incubated with the immunogenic peptide at 1.4  $\mu\text{g}/\text{ul}$  (C). Anti-DAO was visualized with a goat anti-rabbit fluorescent secondary antibody conjugated to Alexa-fluor 596 (Invitrogen).

**Figure S2:** Asc-1 and SRR do not coimmunoprecipitate with BSN. To test the hypothesis that BSN acts as a scaffold for serine-related enzymes such as DAO, Asc-1 and SRR, rat cerebellar lysates were subjected to immunoprecipitation with the anti-BSN antibody and eluted material was immunoblotted with antibodies to Asc-1 (upper panel) and SRR (lower panel). An antibody to Asc-1 detected an immunoreactive band at the expected molecular weight in the input lane but not in the lane containing anti-BSN immunoprecipitates. An antibody to SRR strongly detected an immunoreactive in the input lane, which was displaced by preincubation with 2  $\mu\text{g}/\text{ml}$  of the immunogenic peptide. However, a SRR-specific immunoreactive band was not detected in the lane containing anti-BSN immunoprecipitates

**Figure S3:** BSN inhibits DAO's enzymatic activity in HEK293 cells. BSN constructs that were previously found co-immunoprecipitate DAO partially inhibited DAO's enzymatic activity. Specifically the full length BSN, 95-3263, 1692-3263, and 27153263 co-immunoprecipitated with DAO and significantly inhibited DAO enzymatic activity. BSN 95-609 and GFP, which were found not to coimmunoprecipitate with DAO, did not affect DAO's enzymatic activity. These data suggests that BSN may regulate DAO enzymatic activity within the presynaptic active zone. \*\*\*  $p < 0.001$  by one way ANOVA followed by Dunnett's multiple comparison against GFP-transfected cells.

**Table S1:** Complete list of putative DAO interacting proteins identified from co-immunoprecipitation experiments.

**Table S2:** Presynaptic active zone DAO interacting proteins organized by % protein coverage. The % protein coverage is used as a proxy for the strength of the interaction. As a control DAO was found at 30% suggesting that BSN at 29% may be a strong interacting partner.

Figure S1.

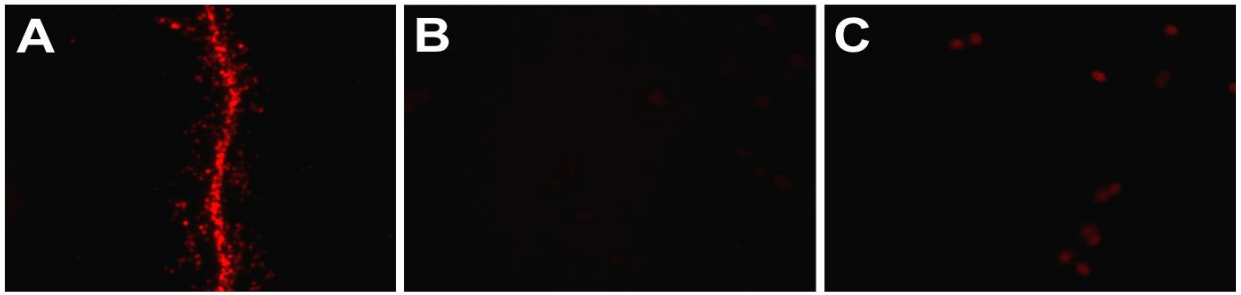

Figure S2.

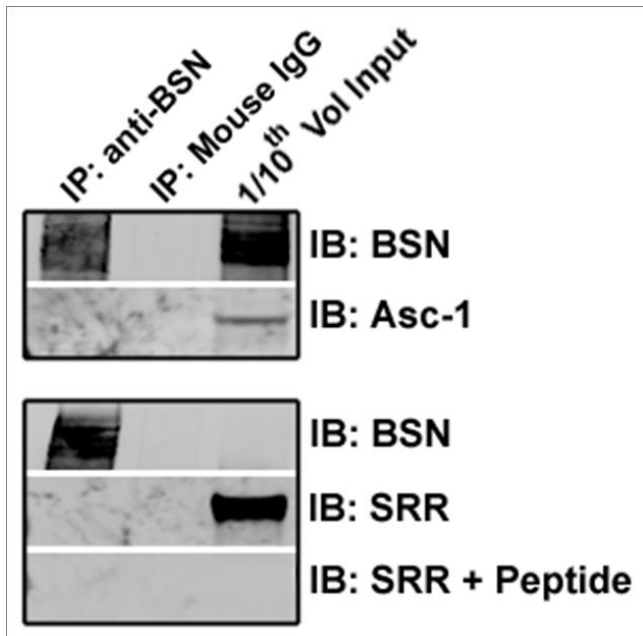

Figure S3.

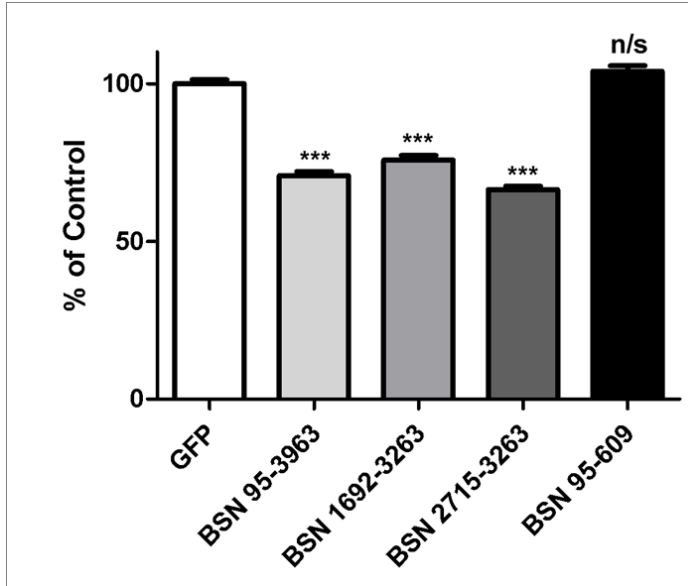

Table S1.

| Protein Name | GI number | Sample   |       |                     |       |         |       |                        |       |         |       |
|--------------|-----------|----------|-------|---------------------|-------|---------|-------|------------------------|-------|---------|-------|
|              |           | PBS Wash |       |                     |       |         |       | RIPA Supplemented Wash |       |         |       |
|              |           | A (IgG)  |       | B (Peptide blocked) |       | C (DAO) |       | D (Peptide blocked)    |       | E (DAO) |       |
|              |           | Unique   | Total | Unique              | Total | Unique  | Total | Unique                 | Total | Unique  | Total |
| DYNC1H1      | 294543    | 4        | 4     | 2                   | 2     | 149     | 202   | 2                      | 2     | 41      | 53    |
| BSN          | 51315687  | 0        | 0     | 2                   | 3     | 52      | 94    | 0                      | 0     | 32      | 60    |
| BAT2D1       | 109498088 | 0        | 0     | 0                   | 0     | 46      | 100   | 0                      | 0     | 19      | 46    |
| PCLO         | 24212076  | 0        | 0     | 0                   | 0     | 41      | 79    | 0                      | 0     | 16      | 27    |
| SACS         | 109501781 | 0        | 0     | 0                   | 0     | 29      | 30    | 0                      | 0     | 3       | 3     |
| MYH10        | 123261983 | 0        | 0     | 0                   | 0     | 20      | 22    | 2                      | 2     | 4       | 4     |
| ACZ          | 15139360  | 0        | 0     | 0                   | 0     | 19      | 47    | 0                      | 0     | 15      | 27    |
| ATP6V0A1     | 123237393 | 1        | 1     | 2                   | 2     | 17      | 51    | 0                      | 0     | 0       | 0     |
| DEPDC2       | 109474572 | 0        | 0     | 0                   | 0     | 15      | 19    | 0                      | 0     | 2       | 3     |
| ATP6V1A      | 109494307 | 2        | 2     | 0                   | 0     | 15      | 18    | 2                      | 2     | 1       | 1     |
| AP2A1        | 109461873 | 1        | 1     | 0                   | 0     | 14      | 16    | 2                      | 2     | 5       | 7     |
| PRKCG        | 74190393  | 0        | 0     | 1                   | 1     | 14      | 16    | 0                      | 0     | 5       | 5     |
| IMMT         | 77917546  | 0        | 0     | 0                   | 0     | 14      | 16    | 1                      | 1     | 2       | 3     |
| SNIP         | 42559551  | 0        | 0     | 0                   | 0     | 13      | 24    | 0                      | 0     | 17      | 24    |
| PC           | 146345499 | 0        | 0     | 1                   | 1     | 13      | 14    | 0                      | 0     | 6       | 7     |
| DAO          | 56972124  | 0        | 0     | 0                   | 0     | 13      | 28    | 0                      | 0     | 5       | 7     |
| ATP6V1B2     | 74177659  | 1        | 1     | 0                   | 0     | 13      | 15    | 4                      | 4     | 4       | 4     |
| SDHA         | 52782765  | 2        | 2     | 0                   | 0     | 13      | 16    | 0                      | 0     | 0       | 0     |
| NDUFA9       | 109474252 | 1        | 1     | 1                   | 1     | 12      | 19    | 0                      | 0     | 1       | 1     |
| ANK1         | 109503539 | 1        | 1     | 0                   | 0     | 12      | 12    | 0                      | 0     | 1       | 1     |
| AP2B1        | 119600539 | 1        | 1     | 0                   | 0     | 11      | 11    | 2                      | 2     | 7       | 8     |
| RPS3         | 12847921  | 0        | 0     | 0                   | 0     | 11      | 13    | 1                      | 1     | 0       | 0     |
| RAPGEF4      | 109468297 | 0        | 0     | 1                   | 1     | 10      | 11    | 1                      | 1     | 12      | 14    |
| CEP97        | 109494268 | 0        | 0     | 0                   | 0     | 10      | 12    | 0                      | 0     | 4       | 4     |
| SLC4A4       | 9437326   | 0        | 0     | 1                   | 1     | 10      | 17    | 1                      | 1     | 3       | 4     |
| ARBP         | 38541406  | 0        | 0     | 1                   | 2     | 10      | 23    | 1                      | 1     | 1       | 1     |
| MAP1A        | 13591886  | 1        | 1     | 1                   | 1     | 10      | 13    | 1                      | 1     | 1       | 1     |
| LOC684558    | 109504000 | 0        | 0     | 0                   | 0     | 10      | 12    | 0                      | 0     | 1       | 1     |
| SLC12A5      | 123240068 | 0        | 0     | 1                   | 1     | 10      | 21    | 0                      | 0     | 0       | 0     |
| ERLIN2       | 109504272 | 0        | 0     | 0                   | 0     | 10      | 13    | 0                      | 0     | 0       | 0     |

|          |           |   |   |   |   |    |    |   |   |    |    |
|----------|-----------|---|---|---|---|----|----|---|---|----|----|
| CNTNAP1  | 17432925  | 1 | 1 | 0 | 0 | 10 | 13 | 0 | 0 | 0  | 0  |
| NDUFS2   | 58865384  | 0 | 0 | 2 | 2 | 10 | 10 | 0 | 0 | 0  | 0  |
| AP2A2    | 13591908  | 0 | 0 | 1 | 1 | 9  | 10 | 3 | 3 | 6  | 8  |
| AP1B1    | 119580203 | 1 | 1 | 0 | 0 | 9  | 9  | 2 | 2 | 6  | 6  |
| PHYHIP   | 77046155  | 0 | 0 | 0 | 0 | 9  | 18 | 0 | 0 | 5  | 7  |
| MAP1B    | 109465851 | 0 | 0 | 0 | 0 | 9  | 12 | 0 | 0 | 4  | 4  |
| PABPC1   | 119612223 | 1 | 1 | 2 | 2 | 9  | 12 | 0 | 0 | 4  | 4  |
| PYGB     | 109471016 | 0 | 0 | 0 | 0 | 9  | 9  | 3 | 3 | 4  | 4  |
| 1BG3B    | 5542104   | 0 | 0 | 0 | 0 | 9  | 9  | 3 | 3 | 2  | 2  |
| C1QBP    | 122065146 | 0 | 0 | 0 | 0 | 9  | 11 | 0 | 0 | 1  | 1  |
| AQP4     | 459951    | 0 | 0 | 0 | 0 | 9  | 85 | 0 | 0 | 0  | 0  |
| NCAM1    | 124517683 | 1 | 1 | 0 | 0 | 9  | 11 | 1 | 1 | 0  | 0  |
| ANK1     | 1360744   | 0 | 0 | 0 | 0 | 9  | 9  | 0 | 0 | 0  | 0  |
| YLPM1    | 146134507 | 0 | 0 | 0 | 0 | 8  | 12 | 0 | 0 | 16 | 26 |
| YLPM1    | 109479674 | 0 | 0 | 0 | 0 | 8  | 11 | 0 | 0 | 16 | 25 |
| AP1B1    | 8392872   | 1 | 1 | 0 | 0 | 8  | 8  | 1 | 1 | 6  | 6  |
| NAPB     | 109470977 | 1 | 1 | 0 | 0 | 8  | 10 | 2 | 2 | 4  | 4  |
| DAO      | 110815857 | 0 | 0 | 0 | 0 | 8  | 16 | 0 | 0 | 2  | 2  |
| TFSM     | 109482048 | 0 | 0 | 0 | 0 | 8  | 18 | 0 | 0 | 1  | 1  |
| NDUFA9   | 13543186  | 1 | 1 | 1 | 1 | 8  | 13 | 0 | 0 | 1  | 1  |
| MYO5A    | 13431673  | 0 | 0 | 0 | 0 | 8  | 9  | 1 | 1 | 1  | 1  |
| MYH9     | 13431671  | 0 | 0 | 0 | 0 | 8  | 8  | 0 | 0 | 1  | 1  |
| SLC1A2   | 10121878  | 1 | 1 | 0 | 0 | 8  | 21 | 0 | 0 | 0  | 0  |
| MTCH2    | 109468417 | 0 | 0 | 0 | 0 | 8  | 14 | 0 | 0 | 0  | 0  |
| ATP8A1   | 109500484 | 0 | 0 | 0 | 0 | 8  | 14 | 0 | 0 | 0  | 0  |
| NDUFB5   | 109466500 | 0 | 0 | 0 | 0 | 8  | 10 | 0 | 0 | 0  | 0  |
| ATP6V1C1 | 13384916  | 0 | 0 | 0 | 0 | 8  | 9  | 0 | 0 | 0  | 0  |
| PRKCB    | 117558040 | 0 | 0 | 0 | 0 | 8  | 8  | 0 | 0 | 0  | 0  |
| NDUFV1   | 55741424  | 0 | 0 | 1 | 1 | 8  | 8  | 1 | 1 | 0  | 0  |

|         |           |   |   |   |   |   |    |   |   |    |    |
|---------|-----------|---|---|---|---|---|----|---|---|----|----|
| ARF5    | 124376432 | 1 | 1 | 1 | 2 | 7 | 12 | 2 | 3 | 7  | 8  |
| RAPGEF4 | 25455682  | 0 | 0 | 0 | 0 | 7 | 8  | 0 | 0 | 7  | 8  |
| SFXN3   | 20139873  | 1 | 1 | 0 | 0 | 7 | 14 | 1 | 1 | 4  | 4  |
| PPP1CB  | 119620935 | 0 | 0 | 0 | 0 | 7 | 7  | 0 | 0 | 4  | 6  |
| NAPA    | 38648848  | 1 | 1 | 1 | 1 | 7 | 8  | 2 | 2 | 3  | 3  |
| PYGB    | 1172226   | 0 | 0 | 0 | 0 | 7 | 7  | 2 | 2 | 3  | 3  |
| RPS18   | 119624100 | 0 | 0 | 0 | 0 | 7 | 13 | 0 | 0 | 1  | 1  |
| SFXN1   | 20139869  | 1 | 1 | 0 | 0 | 7 | 12 | 0 | 0 | 1  | 1  |
| RAB7A   | 119599708 | 0 | 0 | 0 | 0 | 7 | 8  | 0 | 0 | 1  | 1  |
| ANK2    | 109467596 | 0 | 0 | 0 | 0 | 7 | 7  | 0 | 0 | 1  | 1  |
| KIF5C   | 109469894 | 0 | 0 | 0 | 0 | 7 | 7  | 0 | 0 | 1  | 1  |
| NDUFB10 | 109490345 | 0 | 0 | 0 | 0 | 7 | 10 | 0 | 0 | 0  | 0  |
| NEGR1   | 11067409  | 0 | 0 | 0 | 0 | 7 | 10 | 0 | 0 | 0  | 0  |
| ILF2    | 119573671 | 0 | 0 | 0 | 0 | 7 | 9  | 0 | 0 | 0  | 0  |
| RPS8    | 119627428 | 0 | 0 | 0 | 0 | 7 | 9  | 0 | 0 | 0  | 0  |
| FLOT1   | 13124118  | 0 | 0 | 0 | 0 | 7 | 8  | 0 | 0 | 0  | 0  |
| IGSF8   | 15593237  | 0 | 0 | 1 | 1 | 7 | 7  | 1 | 1 | 0  | 0  |
| NDUFV2  | 83305118  | 0 | 0 | 0 | 0 | 7 | 7  | 0 | 0 | 0  | 0  |
| CRMP1   | 40675740  | 1 | 1 | 0 | 0 | 6 | 8  | 1 | 1 | 16 | 26 |
| CRMP1   | 1518520   | 1 | 1 | 0 | 0 | 6 | 8  | 1 | 1 | 13 | 24 |
| ARF4    | 109730919 | 1 | 1 | 1 | 2 | 6 | 10 | 2 | 3 | 5  | 6  |
| CHAINA  | 110590707 | 0 | 0 | 1 | 1 | 6 | 8  | 2 | 4 | 5  | 6  |
| ERC1    | 120300971 | 0 | 0 | 0 | 0 | 6 | 8  | 0 | 0 | 5  | 5  |
| GNB4    | 193714    | 1 | 2 | 1 | 2 | 6 | 10 | 1 | 1 | 3  | 5  |
| MAP1B   | 6678946   | 0 | 0 | 0 | 0 | 6 | 9  | 0 | 0 | 3  | 3  |
| PPP1CC  | 119618344 | 0 | 0 | 0 | 0 | 6 | 6  | 1 | 1 | 3  | 4  |
| MFF     | 40254163  | 0 | 0 | 0 | 0 | 6 | 7  | 0 | 0 | 2  | 2  |
| ANK2    | 119626695 | 0 | 0 | 0 | 0 | 6 | 6  | 0 | 0 | 2  | 2  |
| DMX2    | 94387180  | 0 | 0 | 0 | 0 | 6 | 6  | 0 | 0 | 2  | 2  |
| MAP1B   | 123207791 | 0 | 0 | 1 | 1 | 6 | 9  | 0 | 0 | 1  | 1  |

|          |           |   |   |   |   |   |    |   |   |   |   |
|----------|-----------|---|---|---|---|---|----|---|---|---|---|
| ELALV1   | 109496377 | 0 | 0 | 1 | 1 | 6 | 8  | 0 | 0 | 1 | 1 |
| ATP6VH1  | 62078587  | 0 | 0 | 1 | 1 | 6 | 8  | 0 | 0 | 1 | 1 |
| DNM1L    | 68566301  | 0 | 0 | 0 | 0 | 6 | 7  | 1 | 1 | 1 | 1 |
| RBM14    | 109463348 | 0 | 0 | 0 | 0 | 6 | 6  | 0 | 0 | 1 | 1 |
| NDUFS4   | 119850879 | 0 | 0 | 0 | 0 | 6 | 6  | 0 | 0 | 1 | 1 |
| NDUFB7   | 109508678 | 0 | 0 | 0 | 0 | 6 | 10 | 0 | 0 | 0 | 0 |
| NDUFA12  | 109481873 | 0 | 0 | 0 | 0 | 6 | 9  | 0 | 0 | 0 | 0 |
| RPS19    | 119577477 | 1 | 1 | 0 | 0 | 6 | 8  | 0 | 0 | 0 | 0 |
| MAOA     | 109511497 | 0 | 0 | 0 | 0 | 6 | 7  | 0 | 0 | 0 | 0 |
| DDX5     | 119614609 | 1 | 1 | 0 | 0 | 6 | 7  | 1 | 1 | 0 | 0 |
| MTX2     | 56605654  | 0 | 0 | 0 | 0 | 6 | 7  | 0 | 0 | 0 | 0 |
| STOML2   | 72255527  | 0 | 0 | 0 | 0 | 6 | 7  | 0 | 0 | 0 | 0 |
| NDUFB8   | 109463999 | 0 | 0 | 0 | 0 | 6 | 6  | 0 | 0 | 0 | 0 |
| RPL7     | 109475998 | 0 | 0 | 0 | 0 | 6 | 6  | 0 | 0 | 0 | 0 |
| NDUFB11  | 109511448 | 0 | 0 | 0 | 0 | 6 | 6  | 0 | 0 | 0 | 0 |
| CACNA2D1 | 109732367 | 0 | 0 | 0 | 0 | 6 | 6  | 0 | 0 | 0 | 0 |
| DPP6     | 12408298  | 0 | 0 | 0 | 0 | 6 | 6  | 0 | 0 | 0 | 0 |
| BIN1     | 134053947 | 0 | 0 | 0 | 0 | 6 | 6  | 0 | 0 | 0 | 0 |
| CACNA2D2 | 28212250  | 0 | 0 | 0 | 0 | 6 | 6  | 0 | 0 | 0 | 0 |
| SCCPDH   | 73919297  | 0 | 0 | 0 | 0 | 6 | 6  | 0 | 0 | 0 | 0 |
| CLINT1   | 113865873 | 0 | 0 | 0 | 0 | 5 | 6  | 0 | 0 | 4 | 4 |
| RAB2A    | 119607234 | 0 | 0 | 0 | 0 | 5 | 7  | 0 | 0 | 3 | 5 |
| ENTH     | 109490556 | 0 | 0 | 0 | 0 | 5 | 6  | 0 | 0 | 3 | 3 |
| EEF1A2   | 119595666 | 0 | 0 | 1 | 1 | 5 | 5  | 3 | 3 | 3 | 5 |
| ANK2     | 1703310   | 0 | 0 | 0 | 0 | 5 | 5  | 0 | 0 | 3 | 3 |
| DNM3     | 119611321 | 0 | 0 | 0 | 0 | 5 | 5  | 3 | 3 | 2 | 2 |
| LMNB1    | 17865475  | 0 | 0 | 0 | 0 | 5 | 5  | 2 | 2 | 2 | 2 |
| SYN1     | 206933    | 1 | 1 | 0 | 0 | 5 | 5  | 2 | 2 | 2 | 2 |
| RPL30    | 119612175 | 0 | 0 | 1 | 1 | 5 | 10 | 0 | 0 | 1 | 1 |
| RPL14    | 12621122  | 0 | 0 | 0 | 0 | 5 | 6  | 0 | 0 | 1 | 1 |
| PYGM     | 109463456 | 0 | 0 | 0 | 0 | 5 | 5  | 1 | 1 | 1 | 1 |
| ELAVL1   | 119589355 | 0 | 0 | 1 | 1 | 5 | 5  | 0 | 0 | 1 | 1 |

|            |           |   |   |   |   |   |    |   |   |   |    |
|------------|-----------|---|---|---|---|---|----|---|---|---|----|
| UQCRB      | 17380333  | 1 | 1 | 0 | 0 | 5 | 5  | 0 | 0 | 1 | 1  |
| NDUFA5     | 37748465  | 0 | 0 | 0 | 0 | 5 | 5  | 0 | 0 | 1 | 1  |
| ATP2A3     | 1438541   | 1 | 1 | 0 | 0 | 5 | 10 | 0 | 0 | 0 | 0  |
| RAP1B      | 52138628  | 0 | 0 | 0 | 0 | 5 | 9  | 2 | 2 | 0 | 0  |
| NDUFS8     | 109463301 | 0 | 0 | 0 | 0 | 5 | 7  | 0 | 0 | 0 | 0  |
| NFASC      | 1842429   | 0 | 0 | 0 | 0 | 5 | 6  | 1 | 1 | 0 | 0  |
| HP1BP3     | 40018592  | 0 | 0 | 1 | 1 | 5 | 6  | 0 | 0 | 0 | 0  |
| CAR4       | 67677927  | 0 | 0 | 0 | 0 | 5 | 6  | 0 | 0 | 0 | 0  |
| KCTD12     | 109501957 | 0 | 0 | 0 | 0 | 5 | 5  | 0 | 0 | 0 | 0  |
| GRIA4      | 119587472 | 0 | 0 | 0 | 0 | 5 | 5  | 0 | 0 | 0 | 0  |
| RPS4X      | 119592221 | 0 | 0 | 0 | 0 | 5 | 5  | 0 | 0 | 0 | 0  |
| RAA        | 119614529 | 0 | 0 | 0 | 0 | 5 | 5  | 0 | 0 | 0 | 0  |
| NDUFC2     | 57164133  | 0 | 0 | 0 | 0 | 5 | 5  | 0 | 0 | 0 | 0  |
|            | 348418    | 0 | 0 | 0 | 0 | 5 | 5  | 0 | 0 | 0 | 0  |
| YLPM1      | 146134388 | 0 | 0 | 0 | 0 | 4 | 7  | 0 | 0 | 9 | 14 |
| DYNLL2     | 119614889 | 0 | 0 | 1 | 1 | 4 | 5  | 0 | 0 | 6 | 6  |
| NCOA6      | 109471142 | 0 | 0 | 0 | 0 | 4 | 4  | 0 | 0 | 4 | 5  |
| IDH3B      | 119630986 | 0 | 0 | 0 | 0 | 4 | 4  | 3 | 3 | 4 | 4  |
| PURB       | 81863556  | 0 | 0 | 0 | 0 | 4 | 4  | 1 | 1 | 3 | 3  |
| SLC1A6     | 14091748  | 1 | 1 | 0 | 0 | 4 | 7  | 0 | 0 | 2 | 2  |
| LOC679221  | 109507032 | 1 | 1 | 0 | 0 | 4 | 6  | 0 | 0 | 2 | 3  |
| MYL6       | 109481431 | 0 | 0 | 0 | 0 | 4 | 6  | 0 | 0 | 2 | 2  |
| RGD1565289 | 109510841 | 0 | 0 | 1 | 1 | 4 | 6  | 0 | 0 | 2 | 2  |
| GNAQ       | 13591957  | 0 | 0 | 0 | 0 | 4 | 6  | 2 | 2 | 2 | 2  |
| RAB5C      | 109491867 | 0 | 0 | 0 | 0 | 4 | 5  | 1 | 1 | 2 | 2  |
| RTN4       | 17367410  | 0 | 0 | 0 | 0 | 4 | 5  | 0 | 0 | 2 | 2  |
| TUFM       | 109462848 | 0 | 0 | 0 | 0 | 4 | 4  | 0 | 0 | 2 | 2  |
| MGST3      | 109498993 | 0 | 0 | 0 | 0 | 4 | 4  | 0 | 0 | 2 | 2  |
| VAPA       | 122066700 | 0 | 0 | 0 | 0 | 4 | 8  | 1 | 1 | 1 | 1  |



|           |           |   |   |   |   |   |   |   |   |   |   |
|-----------|-----------|---|---|---|---|---|---|---|---|---|---|
| TARDBP    | 123248910 | 0 | 0 | 1 | 1 | 4 | 7 | 0 | 0 | 1 | 1 |
| GJA1      | 51859470  | 0 | 0 | 0 | 0 | 4 | 7 | 0 | 0 | 1 | 1 |
| RPLP2     | 71795613  | 1 | 1 | 0 | 0 | 4 | 7 | 0 | 0 | 1 | 1 |
| LOC685320 | 109511446 | 0 | 0 | 0 | 0 | 4 | 6 | 0 | 0 | 1 | 1 |
| SEC22B    | 116256065 | 0 | 0 | 0 | 0 | 4 | 5 | 1 | 1 | 1 | 1 |
| ERC2      | 51701368  | 0 | 0 | 0 | 0 | 4 | 5 | 0 | 0 | 1 | 1 |
| LOC679739 | 109504524 | 0 | 0 | 0 | 0 | 4 | 4 | 0 | 0 | 1 | 1 |
| DDX3X     | 109511507 | 0 | 0 | 0 | 0 | 4 | 4 | 0 | 0 | 1 | 1 |
| CADM3     | 114149321 | 0 | 0 | 1 | 1 | 4 | 4 | 1 | 1 | 1 | 1 |
| ANKG119   | 1167996   | 0 | 0 | 0 | 0 | 4 | 4 | 0 | 0 | 1 | 1 |
| CYFIP2    | 119582010 | 0 | 0 | 0 | 0 | 4 | 4 | 0 | 0 | 1 | 1 |
| NDUFA11   | 52000746  | 0 | 0 | 0 | 0 | 4 | 4 | 0 | 0 | 1 | 1 |
| UQCRFS1   | 57114330  | 1 | 1 | 0 | 0 | 4 | 4 | 0 | 0 | 1 | 1 |
| FAM162A   | 81905494  | 0 | 0 | 0 | 0 | 4 | 4 | 0 | 0 | 1 | 1 |
| GRIA1     | 121430    | 0 | 0 | 0 | 0 | 4 | 4 | 0 | 0 | 1 | 1 |
| APOE      | 202959    | 1 | 1 | 0 | 0 | 4 | 7 | 0 | 0 | 0 | 0 |
| RPS2      | 109150084 | 1 | 1 | 0 | 0 | 4 | 6 | 0 | 0 | 0 | 0 |
| SLC32A1   | 109471222 | 0 | 0 | 0 | 0 | 4 | 6 | 0 | 0 | 0 | 0 |
| THY1      | 207310    | 1 | 1 | 0 | 0 | 4 | 6 | 0 | 0 | 0 | 0 |
| INPP5A    | 109463119 | 0 | 0 | 1 | 1 | 4 | 5 | 0 | 0 | 0 | 0 |
| LOC683655 | 109473039 | 0 | 0 | 1 | 1 | 4 | 5 | 0 | 0 | 0 | 0 |
| SDHB      | 109477603 | 0 | 0 | 0 | 0 | 4 | 5 | 0 | 0 | 0 | 0 |
| RPL3      | 119580714 | 0 | 0 | 0 | 0 | 4 | 5 | 0 | 0 | 0 | 0 |
| ITPR3     | 119624149 | 1 | 1 | 0 | 0 | 4 | 5 | 0 | 0 | 0 | 0 |
| MAOA      | 123230076 | 0 | 0 | 0 | 0 | 4 | 5 | 0 | 0 | 0 | 0 |
| MAOB      | 124028639 | 0 | 0 | 0 | 0 | 4 | 5 | 0 | 0 | 0 | 0 |
| STX7      | 146345521 | 0 | 0 | 0 | 0 | 4 | 5 | 0 | 0 | 0 | 0 |
| AMPH      | 14916529  | 0 | 0 | 0 | 0 | 4 | 5 | 1 | 1 | 0 | 0 |
| NTM       | 31982044  | 0 | 0 | 0 | 0 | 4 | 5 | 0 | 0 | 0 | 0 |
| MYH14     | 109461889 | 1 | 1 | 0 | 0 | 4 | 4 | 0 | 0 | 0 | 0 |



Table S2.

| <b>Protein</b> | <b>Protein MW (kDa)</b> | <b>% Protein Coverage</b> |
|----------------|-------------------------|---------------------------|
| Bassoon        | 418                     | 29                        |
| Piccolo        | 552                     | 18                        |
| Epac2          | 123                     | 25                        |
| ELKS           | 128                     | 12                        |
| Munc13-1       | 196                     | 5                         |
| RIM1           | 110                     | 10                        |
| Liprin-a-3     | 149                     | 3                         |
| DAO            | 39                      | 30                        |
